# Supplementary material for: Phylo-geo-network and haplogroup analysis of 611 novel coronavirus (SARS-CoV-2) genomes from India
Source: Life Sci Alliance. 2021 Mar 16;4(5):e202000925. doi: 10.26508/lsa.202000925 (PMC7994317; doi:10.26508/lsa.202000925)
Supplement: Supplementary file 4 [file LSA-2020-00925_TableS4.xlsx]

## Sheet: Supplementary Table 4
Supplementary Table 4: Details of lineage analysis of studied genomes
		GISAID		Genome Detective			NCBI BLAST	PANGOLIN							COVIDEX		COVIDEX		COVIDEX
S No	Genome ID	Accession ID	State	Genome Length	NT Identity (%)	AA Identity (%)	Per. ident	Lineage	Bootstrap	SH-aLRT	Most common countries	Number of taxa	Date range	Days since last sampling	NEXTSTRAIN Nomenclature prediccion	NEXTSTRAIN probability	Rambault prediccion	Rambault probability	FMDV Serotype Nomenclature prediccion	FMDV probability	Haplogroup
1	NC_045512.2	NC_045512.2	Wuhan, China	29903	100	100	0	B	99	100	UK, China, USA	1016	December-24, April-23	22	A7	0.371	B	1	A	0.234	A1
4	420543	EPI_ISL_420543	Maharashtra	29869	99.9799	99.9721	99.98	B.1	88	95	UK, USA, Australia	7440	January-24, May-21	48	A2a	0.98	B.1	0.952	A	0.232	A1.1.1
5	420544	EPI_ISL_420544	Maharashtra	29903	99.9833	99.9721	99.98	B.1	97	100	UK, USA, Australia	6733	January-24, April-23	25	A2a	1	B.1	0.988	A	0.233	A1.1
6	420545	EPI_ISL_420545	Maharashtra	29862	99.9799	99.9721	99.98	B.1	95	95	UK, USA, Australia	7440	January-24, May-21	48	A2a	0.98	B.1	0.953	A	0.232	A1.1.1
7	420546	EPI_ISL_420546	Maharashtra	29902	99.9833	99.9721	99.98	B.1	96	95	UK, USA, Australia	7440	January-24, May-21	48	A2a	1	B.1	0.988	A	0.233	A1.1
8	420547	EPI_ISL_420547	Maharashtra	29851	99.9833	99.9721	99.98	B.1	98	100	UK, USA, Australia	7440	January-24, May-21	48	A2a	0.999	B.1	0.992	A	0.233	A1.1
9	420548	EPI_ISL_420548	Maharashtra	29876	99.9833	99.9721	99.98	B.1	97	100	UK, USA, Australia	7440	January-24, May-21	48	A2a	1	B.1	0.988	A	0.233	A1.1
10	420549	EPI_ISL_420549	Maharashtra	29858	99.9833	99.9721	99.98	B.1	97	96	UK, USA, Australia	7440	January-24, May-21	48	A2a	1	B.1	0.99	A	0.233	A1.1
11	420550	EPI_ISL_420550	Maharashtra	29886	99.9833	99.9721	99.98	B.1	96	95	UK, USA, Australia	7440	January-24, May-21	48	A2a	1	B.1	0.988	A	0.233	A1.1
12	420551	EPI_ISL_420551	Maharashtra	29856	99.9833	99.9721	99.98	B.1	95	95	UK, USA, Australia	7440	January-24, May-21	48	A2a	1	B.1	0.99	A	0.233	A1.1
13	420552	EPI_ISL_420552	Maharashtra	29892	99.9833	99.9721	99.98	B.1	97	94	UK, USA, Australia	7440	January-24, May-21	48	A2a	1	B.1	0.988	A	0.233	A1.1
14	420553	EPI_ISL_420553	Maharashtra	29871	99.9799	99.9721	99.98	B.1	96	95	UK, USA, Australia	7440	January-24, May-21	48	A2a	1	B.1	0.989	A	0.233	A1.1
15	420554	EPI_ISL_420554	Maharashtra	29882	99.9799	99.9721	99.98	B.1	95	96	UK, USA, Australia	7440	January-24, May-21	48	A2a	1	B.1	0.988	A	0.233	A1.1
16	420555	EPI_ISL_420555	Maharashtra	29860	99.9732	99.9651	99.97	B.1.1	96	100	UK, Australia, USA	6287	February-15, May-20	49	A2a	1	B.1.1	1	A	0.232	A1
17	420556	EPI_ISL_420556	Maharashtra	29897	99.9732	99.9651	99.97	B.1.1	96	96	UK, Australia, USA	6287	February-15, May-20	49	A2a	1	B.1.1	1	A	0.232	A1
32	424364	EPI_ISL_424364	Maharashtra	29857	99.9766	99.9791	99.98	B.1	95	96	UK, USA, Australia	7440	January-24, May-21	48	A2a	1	B.1	1	A	0.233	A1.2
33	424365	EPI_ISL_424365	Maharashtra	29862	99.9766	99.9791	99.98	B.1	96	94	UK, USA, Australia	7440	January-24, May-21	48	A2a	1	B.1	0.999	A	0.233	A1.2
34	426179	EPI_ISL_426179	Maharashtra	29860	99.9732	99.9651	99.97	B.1.1	96	100	UK, Australia, USA	6287	February-15, May-20	49	A2a	1	B.1.1	1	A	0.232	A1
37	428479	EPI_ISL_428479	Karnataka	29839	99.9591	99.9224	99.95	B.1.1	94	94	UK, Australia, USA	6287	February-15, May-20	49	A2a	0.988	B.1.1	0.761	A	0.236	A1
42	428484	EPI_ISL_428484	Karnataka	29836	99.9727	99.9223	99.97	B	100	100	UK, USA, China	1714	December-24, May-18	51	A3	0.253	B.6	0.674	A	0.236	A1
46	430464	EPI_ISL_430464	West Bengal	29858	99.9732	99.9581	99.97	B.1.1	95	95	UK, Australia, USA	6287	February-15, May-20	49	A2a	1	B.1.1	0.976	A	0.232	A1.3
47	430465	EPI_ISL_430465	West Bengal	29858	99.9732	99.9651	99.97	B.1.1	96	96	UK, Australia, USA	6287	February-15, May-20	49	A2a	1	B.1.1	1	A	0.232	A1.4
49	430467	EPI_ISL_430467	West Bengal	29856	99.9766	99.9651	99.98	B.1	97	100	UK, USA, Australia	7440	January-24, May-21	48	A2a	1	B.1	0.968	A	0.232	A1
50	430468	EPI_ISL_430468	West Bengal	29855	99.9732	99.9581	99.97	B.1.1	96	95	UK, Australia, USA	6287	February-15, May-20	49	A2a	1	B.1.1	0.981	A	0.232	A1.3
52	431102	EPI_ISL_431102	Telangana	29903	99.9866	99.986	99.99	B.1	99	100	UK, USA, Australia	6733	January-24, April-23	25	A2a	1	B.1	1	A	0.233	A1
53	431103	EPI_ISL_431103	Telangana	29903	99.9665	99.9233	99.97	B.6	100	100	Australia, Singapore, USA	94	March-04, April-15	33	A3	0.291	B.6	0.997	A	0.233	A1
54	431117	EPI_ISL_431117	Telangana	29903	99.9732	99.9651	99.97	B.1	100	100	UK, USA, Australia	6733	January-24, April-23	25	A2a	1	B.1.1	1	A	0.232	A1
55	435049	EPI_ISL_435049	Gujarat	29903	99.9866	99.9791	99.94	B.1	99	100	UK, USA, Australia	6733	January-24, April-23	25	A2a	1	B.1	1	A	0.233	A1
60	435054	EPI_ISL_435054	Gujarat	29903	99.9732	99.9581	99.97	B.1	99	100	UK, USA, Australia	6733	January-24, April-23	25	A2a	1	B.1	1	A	0.233	A1
61	435055	EPI_ISL_435055	Gujarat	29903	99.9631	99.9581	99.96	B.1.36	97	100	Turkey, Finland, UK	32	March-10, April-01	47	A2a	1	B.1.36	0.901	A	0.232	A1.6.1.1.1.1
62	435056	EPI_ISL_435056	Gujarat	29903	99.9295	99.8883	99.84	B.1	96	100	UK, USA, Australia	6733	January-24, April-23	25	A2a	1	B.1	0.937	A	0.233	A1.5
66	435063	EPI_ISL_435063	Delhi	29866	99.9464	99.8814	99.95	B.1	100	100	UK, USA, Australia	7440	January-24, May-21	48	A2a	1	B.1	0.973	A	0.231	A1.6
67	435064	EPI_ISL_435064	Delhi	29868	99.9665	99.9163	99.97	B.1	100	100	UK, USA, Australia	7440	January-24, May-21	48	A2a	0.997	B.1	0.994	A	0.233	A1.6
68	435065	EPI_ISL_435065	Delhi	29867	99.8962	99.7837	99.9	B.1.36	98	100	Saudi_Arabia, UK, Turkey	159	March-10, May-07	62	A2a	0.975	B.1.36	0.784	A	0.232	A1.6.1.1
69	435066	EPI_ISL_435066	Delhi	29866	99.933	99.9163	99.93	B.1.36	99	100	Saudi_Arabia, UK, Turkey	159	March-10, May-07	62	A2a	1	B.1.36	0.908	A	0.233	A1.6.1.1
71	435068	EPI_ISL_435068	Delhi	29866	99.9531	99.9302	99.95	B.1.36	98	100	Saudi_Arabia, UK, Turkey	159	March-10, May-07	62	A2a	1	B.1.36	0.922	A	0.231	A1.6.1.1
72	435069	EPI_ISL_435069	Delhi	29871	99.9397	99.8884	99.94	B.1.36	98	100	Saudi_Arabia, UK, Turkey	159	March-10, May-07	62	A2a	0.997	B.1.36	0.909	A	0.232	A1.6.1.1
73	435070	EPI_ISL_435070	Delhi	29866	99.8493	99.6651	99.85	B.1.1	99	95	UK, Australia, USA	6287	February-15, May-20	49	A2a	0.992	B.1.1	0.936	A	0.23	A1
74	435071	EPI_ISL_435071	Delhi	29866	99.9565	99.9302	99.96	B.1.1	95	93	UK, Australia, USA	6287	February-15, May-20	49	A2a	1	B.1.1	0.983	A	0.232	A1
76	435074	EPI_ISL_435074	West Bengal	29811	99.9698	99.9302	99.97	B.6	100	100	India, Singapore, Australia	221	March-04, April-05	-636	A6	0.274	B.6	0.974	A	0.234	A1
77	435078	EPI_ISL_435078	Tamil Nadu	29866	99.8995	99.7488	99.9	B	100	100	UK, USA, China	1714	December-24, May-18	51	A7	0.265	B.6	0.825	A	0.232	A1
78	435080	EPI_ISL_435080	Tamil Nadu	29866	99.8717	99.6772	99.88	B.6	100	95	India, Singapore, Australia	221	March-04, April-05	-636	A3	0.262	B.6	0.878	A	0.232	A1
79	435081	EPI_ISL_435081	West Bengal	29867	99.9464	99.8395	99.95	B.6	100	96	India, Singapore, Australia	221	March-04, April-05	-636	A2	0.303	B.6	0.877	A	0.231	A1
81	435083	EPI_ISL_435083	Tamil Nadu	29866	99.9328	99.8318	99.92	B.6	98	96	India, Singapore, Australia	221	March-04, April-05	-636	A3	0.258	B.6	0.873	A	0.234	A1
82	435084	EPI_ISL_435084	Tamil Nadu	29866	99.9094	99.8393	99.94	B	100	100	UK, USA, China	1714	December-24, May-18	51	A3	0.273	B.6	0.933	A	0.231	A1
83	435085	EPI_ISL_435085	Maharashtra	29866	99.9196	99.7767	99.92	B	100	100	UK, USA, China	1714	December-24, May-18	51	A3	0.325	B.6	0.915	A	0.233	A1
84	435086	EPI_ISL_435086	Maharashtra	29867	99.9163	99.8256	99.92	B.6	99	100	India, Singapore, Australia	221	March-04, April-05	-636	A3	0.318	B.6	0.92	A	0.231	A1
85	435087	EPI_ISL_435087	Tamil Nadu	29866	99.902	99.7672	99.89	B.6	100	96	India, Singapore, Australia	221	March-04, April-05	-636	A3	0.3	B.6	0.909	A	0.231	A1
86	435088	EPI_ISL_435088	Odisha	29866	99.9055	99.7263	99.91	B.6	100	97	India, Singapore, Australia	221	March-04, April-05	-636	A3	0.243	B.6	0.953	A	0.24	A1
87	435090	EPI_ISL_435090	Jammu	29867	99.9397	99.8395	99.87	B.6	100	100	India, Singapore, Australia	221	March-04, April-05	-636	A7	0.255	B.6	0.985	A	0.23	A1
88	435091	EPI_ISL_435091	Tamil Nadu	29867	99.9531	99.8744	99.95	B.6	100	100	India, Singapore, Australia	221	March-04, April-05	-636	A3	0.293	B.6	0.998	A	0.232	A1
89	435092	EPI_ISL_435092	Tamil Nadu	29866	99.9297	99.8395	99.93	B.6	99	100	India, Singapore, Australia	221	March-04, April-05	-636	A3	0.322	B.6	0.988	A	0.23	A1
90	435093	EPI_ISL_435093	Tamil Nadu	29866	99.9431	99.8674	99.94	B.6	100	100	India, Singapore, Australia	221	March-04, April-05	-636	A3	0.266	B.6	0.963	A	0.231	A1
91	435094	EPI_ISL_435094	Tamil Nadu	29866	99.9632	99.9163	99.96	B.6	100	100	India, Singapore, Australia	221	March-04, April-05	-636	A3	0.278	B.6	0.998	A	0.234	A1
92	435095	EPI_ISL_435095	Tamil Nadu	29866	99.9598	99.9093	99.96	B.6	99	97	India, Singapore, Australia	221	March-04, April-05	-636	A3	0.292	B.6	0.999	A	0.233	A1
93	435096	EPI_ISL_435096	Tamil Nadu	29866	99.9699	99.9302	99.97	B.6	100	100	India, Singapore, Australia	221	March-04, April-05	-636	A3	0.299	B.6	0.999	A	0.235	A1
94	435097	EPI_ISL_435097	West Bengal	29866	99.9699	99.9233	99.97	B.6	100	100	India, Singapore, Australia	221	March-04, April-05	-636	A3	0.295	B.6	1	A	0.232	A1
95	435098	EPI_ISL_435098	Delhi	29866	99.9196	99.8186	99.92	B.6	100	100	India, Singapore, Australia	221	March-04, April-05	-636	A3	0.285	B.6	0.953	A	0.234	A1
96	435099	EPI_ISL_435099	Uttar Pradesh	29873	99.9565	99.8814	99.96	B.6	100	100	India, Singapore, Australia	221	March-04, April-05	-636	A3	0.322	B.6	1	A	0.232	A1
97	435100	EPI_ISL_435100	Uttar Pradesh	29866	99.9531	99.9093	99.95	B.6	99	97	India, Singapore, Australia	221	March-04, April-05	-636	A3	0.311	B.6	0.99	A	0.233	A1
98	435101	EPI_ISL_435101	Ladakh	29866	99.9565	99.9023	99.96	B.4	100	100	Australia, UK, Turkey	258	January-18, April-14	85	A3	0.986	B.4	0.972	A	0.233	A1.23
99	435102	EPI_ISL_435102	Ladakh	29866	99.9262	99.8254	99.93	B.4	100	100	Australia, UK, Turkey	258	January-18, April-14	85	A3	0.935	B.4	0.914	A	0.233	A1.23
100	435103	EPI_ISL_435103	Ladakh	29866	99.9464	99.8605	99.95	B.4	100	100	Australia, UK, Turkey	258	January-18, April-14	85	A3	0.92	B.4	0.918	A	0.233	A1.23
108	435112	EPI_ISL_435112	Bihar	29866	99.9297	99.8674	99.93	B.6	100	100	India, Singapore, Australia	221	March-04, April-05	-636	A3	0.273	B.6	0.955	A	0.234	A1
109	436413	EPI_ISL_436413	Uttar Pradesh	29866	99.9358	99.8597	99.95	B.1.1	97	100	UK, Australia, USA	6287	February-15, May-20	49	A2a	0.999	B.1.1	0.976	A	0.23	A1
110	436414	EPI_ISL_436414	West Bengal	29866	99.9297	99.8535	99.93	B.6	100	100	India, Singapore, Australia	221	March-04, April-05	-636	A1a	0.296	B.6	0.516	A	0.234	A1.7
112	436417	EPI_ISL_436417	Bihar	29870	99.9561	99.9018	99.96	B.6	100	100	India, Singapore, Australia	221	March-04, April-05	-636	A3	0.3	B.6	0.964	A	0.234	A1
113	436418	EPI_ISL_436418	Tamil Nadu	29866	99.9161	99.7834	99.93	B.6	100	100	India, Singapore, Australia	221	March-04, April-05	-636	A3	0.274	B.6	0.973	A	0.233	A1
115	436420	EPI_ISL_436420	Rajasthan	29866	99.9498	99.8744	99.95	B.6	100	100	India, Singapore, Australia	221	March-04, April-05	-636	A3	0.289	B.6	0.99	A	0.233	A1
116	436421	EPI_ISL_436421	Assam	29866	99.9296	99.8116	99.93	B.6	97	95	India, Singapore, Australia	221	March-04, April-05	-636	A1a	0.294	B.6	0.86	A	0.234	A1.7
117	436422	EPI_ISL_436422	Assam	29866	99.9196	99.7907	99.92	B.6	100	100	India, Singapore, Australia	221	March-04, April-05	-636	A3	0.257	B.6	0.997	A	0.234	A1
118	436424	EPI_ISL_436424	Delhi	29866	99.9029	99.7767	99.9	B.6	100	100	India, Singapore, Australia	221	March-04, April-05	-636	A3	0.243	B.6	0.902	A	0.233	A1
120	436426	EPI_ISL_436426	Delhi	29866	99.9196	99.8535	99.92	B.6	100	100	India, Singapore, Australia	221	March-04, April-05	-636	A3	0.253	B.6	0.959	A	0.234	A1.8
121	436428	EPI_ISL_436428	Delhi	29866	99.9363	99.8744	99.94	B.6	99	100	India, Singapore, Australia	221	March-04, April-05	-636	A3	0.266	B.6	0.955	A	0.234	A1
122	436429	EPI_ISL_436429	Delhi	29866	99.9129	99.8116	99.91	B.6	98	93	India, Singapore, Australia	221	March-04, April-05	-636	A3	0.253	B.6	0.894	A	0.234	A1
123	436430	EPI_ISL_436430	Delhi	29866	99.953	99.8743	99.96	B.6	99	100	India, Singapore, Australia	221	March-04, April-05	-636	A3	0.276	B.6	0.979	A	0.234	A1
124	436431	EPI_ISL_436431	Delhi	29866	99.9364	99.8395	99.94	B.6	100	100	India, Singapore, Australia	221	March-04, April-05	-636	A3	0.268	B.6	0.993	A	0.233	A1
126	436433	EPI_ISL_436433	Delhi	29866	99.9296	99.8465	99.93	B.6	100	100	India, Singapore, Australia	221	March-04, April-05	-636	A3	0.277	B.6	0.96	A	0.233	A1
128	436435	EPI_ISL_436435	Delhi	29866	99.8996	99.7558	99.9	B.6	100	97	India, Singapore, Australia	221	March-04, April-05	-636	A3	0.292	B.6	0.91	A	0.232	A1
129	436436	EPI_ISL_436436	Delhi	29866	99.8851	99.7052	99.89	B.6	97	92	India, Singapore, Australia	221	March-04, April-05	-636	A3	0.21	B.6	0.786	A	0.235	A1
130	436437	EPI_ISL_436437	Delhi	29866	99.8822	99.7343	99.89	B.6	98	96	India, Singapore, Australia	221	March-04, April-05	-636	A1a	0.285	B.6	0.838	A	0.236	A1
133	436445	EPI_ISL_436445	Delhi	29866	99.9062	99.7558	99.91	B.6	100	100	India, Singapore, Australia	221	March-04, April-05	-636	A7	0.28	B.6	0.887	A	0.234	A1
134	436447	EPI_ISL_436447	Karnataka	29873	99.9397	99.8814	99.94	B.6	100	100	India, Singapore, Australia	221	March-04, April-05	-636	A3	0.329	B.6	0.991	A	0.233	A1
135	436448	EPI_ISL_436448	Delhi	29874	99.9531	99.8744	99.95	B.6	100	100	India, Singapore, Australia	221	March-04, April-05	-636	A1a	0.3	B.6	0.957	A	0.234	A1
136	436449	EPI_ISL_436449	Bihar	29868	99.933	99.8395	99.93	B.6	100	100	India, Singapore, Australia	221	March-04, April-05	-636	A7	0.257	B.6	0.957	A	0.233	A1.8
138	436451	EPI_ISL_436451	Delhi	29866	99.9397	99.8535	99.94	B.6	100	100	India, Singapore, Australia	221	March-04, April-05	-636	A3	0.272	B.6	0.995	A	0.233	A1
140	436453	EPI_ISL_436453	Madhya Pradesh	29867	99.9189	99.8386	99.92	B.1	99	100	UK, USA, Australia	7440	January-24, May-21	48	A2a	0.985	B.1	0.885	A	0.238	A1
142	436455	EPI_ISL_436455	Delhi	29870	99.9598	99.9233	99.96	B.1	99	100	UK, USA, Australia	7440	January-24, May-21	48	A2a	1	B.1	0.96	A	0.234	A1
147	436460	EPI_ISL_436460	Madhya Pradesh	29866	99.933	99.8674	99.93	B.1	100	100	UK, USA, Australia	7440	January-24, May-21	48	A2a	0.964	B.1	0.896	A	0.233	A1
148	436461	EPI_ISL_436461	Madhya Pradesh	29866	99.9598	99.9233	99.96	B.1	100	100	UK, USA, Australia	7440	January-24, May-21	48	A2a	0.998	B.1	0.978	A	0.234	A1
149	436462	EPI_ISL_436462	Madhya Pradesh	29870	99.9531	99.9302	99.95	B.1	100	100	UK, USA, Australia	7440	January-24, May-21	48	A2a	1	B.1	0.982	A	0.233	A1
150	436463	EPI_ISL_436463	Madhya Pradesh	29866	99.8817	99.6702	99.87	B.1	93	92	UK, USA, Australia	7440	January-24, May-21	48	A2a	0.733	B.1	0.702	A	0.231	A1
154	437442	EPI_ISL_437442	Gujarat	29903	99.936	99.8597	99.94	B.6	100	96	Australia, Singapore, USA	94	March-04, April-15	33	A1a	0.293	B.6	0.94	A	0.229	A1.24
155	437444	EPI_ISL_437444	Gujarat	29903	99.9732	99.9512	99.97	B.6	99	96	Australia, Singapore, USA	94	March-04, April-15	33	A1a	0.255	B.6	0.978	A	0.233	A1.24
158	437447	EPI_ISL_437447	Gujarat	29903	99.9798	99.958	99.92	B.1	95	100	UK, USA, Australia	6733	January-24, April-23	25	A2a	0.999	B.1	0.986	A	0.233	A1.9
159	437448	EPI_ISL_437448	Gujarat	29903	99.9832	99.986	99.98	B.1	99	100	UK, USA, Australia	6733	January-24, April-23	25	A2a	1	B.1	0.848	A	0.233	A1.9
160	437449	EPI_ISL_437449	Gujarat	29903	99.9698	99.9651	99.97	B.1.36	76	100	Turkey, Finland, UK	32	March-10, April-01	47	A2a	1	B.1.36	0.79	A	0.233	A1.6.1.5
166	437539	EPI_ISL_437539	West Bengal	29903	99.9799	99.9791	99.98	B.1	98	100	UK, USA, Australia	6733	January-24, April-23	25	A2a	1	B.1	0.98	A	0.234	A1
167	437626	EPI_ISL_437626	Telangana	29903	99.9699	99.9721	99.97	B.1	100	100	UK, USA, Australia	6733	January-24, April-23	25	A2a	1	B.1	1	A	0.233	A1.6
168	438138	EPI_ISL_438138	Telangana	29903	99.9732	99.9512	99.97	B.6	100	100	Australia, Singapore, USA	94	March-04, April-15	33	A3	0.309	B.6	1	A	0.232	A1
169	438139	EPI_ISL_438139	Telangana	29903	99.9799	99.9512	99.98	B.6	100	100	India, Singapore, Australia	221	March-04, April-05	-636	A3	0.315	B.6	1	A	0.233	A1
170	444456	EPI_ISL_444456	Gujarat	29903	99.9732	99.9651	99.97	B.1.36	80	100	Turkey, Finland, UK	32	March-10, April-01	47	A2a	1	B.1.36	0.513	A	0.233	A1.6.1.2
171	444457	EPI_ISL_444457	Gujarat	29903	99.9732	99.9651	99.97	B.1.36	76	100	Turkey, Finland, UK	32	March-10, April-01	47	A2a	1	B.1.36	0.527	A	0.233	A1.6.1.2
174	444460	EPI_ISL_444460	Gujarat	29903	99.9833	99.986	99.98	B.1	98	100	UK, USA, Australia	6733	January-24, April-23	25	A2a	0.999	B.1	0.844	A	0.233	A1.9
175	444461	EPI_ISL_444461	Gujarat	29903	99.9665	99.9651	99.97	B.1.36	97	100	Turkey, Finland, UK	32	March-10, April-01	47	A2a	1	B.1.36	0.904	A	0.232	A1.6.1.1.1
179	444465	EPI_ISL_444465	Gujarat	29903	99.9598	99.9581	99.96	B.1.36	99	100	Turkey, Finland, UK	32	March-10, April-01	47	A2a	1	B.1.36	0.866	A	0.232	A1.6.1.1.1.2
180	444466	EPI_ISL_444466	Gujarat	29903	99.9631	99.9581	99.96	B.1.36	96	100	Turkey, Finland, UK	32	March-10, April-01	47	A2a	1	B.1.36	0.868	A	0.232	A1.6.1.1.1.2
183	444469	EPI_ISL_444469	Gujarat	29903	99.9564	99.9372	99.96	B.1.36	99	100	Turkey, Finland, UK	32	March-10, April-01	47	A2a	1	B.1.36	0.868	A	0.231	A1.6.1.1.2
184	444470	EPI_ISL_444470	Gujarat	29903	99.9665	99.9651	99.97	B.1.36	69	100	Turkey, Finland, UK	32	March-10, April-01	47	A2a	1	B.1.36	0.708	A	0.233	A1.6.1.5
185	444471	EPI_ISL_444471	Gujarat	29903	99.9765	99.9791	99.98	B.1.36	82	100	Turkey, Finland, UK	32	March-10, April-01	47	A2a	1	B.1.36	0.514	A	0.233	A1.6.1
186	444472	EPI_ISL_444472	Gujarat	29903	99.9665	99.9651	99.97	B.1.36	97	100	Turkey, Finland, UK	32	March-10, April-01	47	A2a	1	B.1.36	0.903	A	0.232	A1.6.1.1.1
193	444479	EPI_ISL_444479	Gujarat	29903	99.9799	99.9791	99.98	B.1	95	100	UK, USA, Australia	6733	January-24, April-23	25	A2a	1	B.1	0.992	A	0.233	A1.10
195	444481	EPI_ISL_444481	Gujarat	29903	99.9866	99.986	99.99	B.1	100	100	UK, USA, Australia	6733	January-24, April-23	25	A2a	1	B.1	1	A	0.233	A1
196	444482	EPI_ISL_444482	Gujarat	29903	99.9732	99.9651	99.97	B.1.36	78	100	Turkey, Finland, UK	32	March-10, April-01	47	A2a	0.996	B.1.36	0.505	A	0.232	A1.6.1
197	444483	EPI_ISL_444483	Gujarat	29903	99.9833	99.9721	99.98	B.1	99	100	UK, USA, Australia	6733	January-24, April-23	25	A2a	0.999	B.1	0.998	A	0.233	A1.11
198	444484	EPI_ISL_444484	Gujarat	29903	99.9698	99.972	99.97	B.1.36	67	77	Turkey, Finland, UK	32	March-10, April-01	47	A2a	1	B.1	0.478	A	0.233	A1.6.1.3
199	444485	EPI_ISL_444485	Gujarat	29903	99.9698	99.958	99.97	B.1.36	67	77	Turkey, Finland, UK	32	March-10, April-01	47	A2a	1	B.1	0.524	A	0.233	A1.6.1.3
202	447031	EPI_ISL_447031	Gujarat	29903	99.9866	99.986	99.99	B.1	99	100	UK, USA, Australia	6733	January-24, April-23	25	A2a	1	B.1	1	A	0.233	A1
203	447032	EPI_ISL_447032	Gujarat	29903	99.9798	99.9511	99.98	B.1	97	100	UK, USA, Australia	6733	January-24, April-23	25	A2a	1	B.1	0.964	A	0.232	A1
204	447033	EPI_ISL_447033	Gujarat	29903	99.9598	99.9512	99.96	B.1.36	96	100	Turkey, Finland, UK	32	March-10, April-01	47	A2a	1	B.1.36	0.807	A	0.23	A1.6.1.1.1.3
205	447034	EPI_ISL_447034	Gujarat	29903	99.9529	99.93	99.97	B.1.36	96	100	Turkey, Finland, UK	32	March-10, April-01	53	A2a	1	B.1.36	0.672	A	0.232	A1.6.1.1.2
206	447035	EPI_ISL_447035	Gujarat	29903	99.9631	99.9581	99.96	B.1.36	99	100	Turkey, Finland, UK	32	March-10, April-01	47	A2a	1	B.1.36	0.857	A	0.232	A1.6.1.1.1.2
209	447038	EPI_ISL_447038	Gujarat	29903	99.9799	99.9651	99.98	B.1	98	100	UK, USA, Australia	6733	January-24, April-23	25	A2a	0.998	B.1	0.991	A	0.233	A1
210	447039	EPI_ISL_447039	Gujarat	29903	99.9631	99.9651	99.96	B.1.36	99	100	Turkey, Finland, UK	32	March-10, April-01	47	A2a	1	B.1.36	0.877	A	0.232	A1.6.1.1.1
211	447040	EPI_ISL_447040	Gujarat	29903	99.9564	99.9512	99.96	B.1.36	96	100	Turkey, Finland, UK	32	March-10, April-01	47	A2a	0.986	B.1.36	0.753	A	0.232	A1.6.1.1.1
212	447041	EPI_ISL_447041	Gujarat	29903	99.9698	99.9721	99.97	B.1.36	69	100	Turkey, Finland, UK	32	March-10, April-01	47	A2a	0.996	B.1	0.669	A	0.232	A1.6.1.1
215	447044	EPI_ISL_447044	Gujarat	29903	99.9598	99.9512	99.96	B.1.36	95	100	Turkey, Finland, UK	32	March-10, April-01	47	A2a	1	B.1.36	0.87	A	0.232	A1.6.1.1.2
218	447047	EPI_ISL_447047	Gujarat	29903	99.9866	99.986	99.99	B.1	99	100	UK, USA, Australia	6733	January-24, April-23	25	A2a	1	B.1	1	A	0.233	A1
221	447050	EPI_ISL_447050	Gujarat	29903	99.9631	99.9581	99.96	B.1.36	98	100	Turkey, Finland, UK	32	March-10, April-01	47	A2a	1	B.1.36	0.908	A	0.232	A1.6.1.1.1.1
222	447051	EPI_ISL_447051	Gujarat	29903	99.9631	99.9581	99.96	B.1.36	96	100	Turkey, Finland, UK	32	March-10, April-01	47	A2a	1	B.1.36	0.908	A	0.232	A1.6.1.1.1.1
223	447052	EPI_ISL_447052	Gujarat	29903	99.9799	99.9791	99.98	B.1	95	100	UK, USA, Australia	6733	January-24, April-23	25	A2a	1	B.1	0.992	A	0.233	A1.10
226	447535	EPI_ISL_447535	Gujarat	29903	99.9665	99.9651	99.97	B.1.36	68	76	Turkey, Finland, UK	32	March-10, April-01	47	A2a	0.999	B.1.36	0.493	A	0.233	A1.6.1.3
227	447536	EPI_ISL_447536	Gujarat	29903	99.9731	99.9581	99.83	B.1.36	68	76	Turkey, Finland, UK	32	March-10, April-01	47	A2	0.494	B.1.36	0.321	A	0.234	A1.6.1.5
229	447538	EPI_ISL_447538	Gujarat	29903	99.9731	99.9721	99.97	B.1.36	65	79	Turkey, Finland, UK	32	March-10, April-01	47	A2	0.493	B.1.36	0.356	A	0.234	A1.6.1.5
231	447540	EPI_ISL_447540	Gujarat	29903	99.9698	99.9721	99.97	B.1.36	75	100	Turkey, Finland, UK	32	March-10, April-01	47	A2a	1	B.1	0.5	A	0.233	A1.6.1.3
232	447541	EPI_ISL_447541	Gujarat	29903	99.9665	99.9581	99.97	B.1.36	64	78	Turkey, Finland, UK	32	March-10, April-01	47	A2a	0.999	B.1	0.505	A	0.233	A1.6.1.3
233	447542	EPI_ISL_447542	Gujarat	29903	99.9665	99.9581	99.97	B.1.36	68	78	Turkey, Finland, UK	32	March-10, April-01	47	A2a	0.999	B.1	0.501	A	0.233	A1.6.1.3
234	447543	EPI_ISL_447543	Gujarat	29903	99.9698	99.9721	99.97	B.1.36	71	100	Turkey, Finland, UK	32	March-10, April-01	47	A2a	1	B.1	0.496	A	0.233	A1.6.1.3
235	447544	EPI_ISL_447544	Gujarat	29903	99.9832	99.9721	99.98	B.1	99	100	UK, USA, Australia	6733	January-24, April-23	25	A2a	1	B.1	1	A	0.233	A1.11
236	447545	EPI_ISL_447545	Gujarat	29903	99.9832	99.9721	99.98	B.1	98	100	UK, USA, Australia	6733	January-24, April-23	25	A2a	1	B.1	1	A	0.233	A1.11
237	447546	EPI_ISL_447546	Gujarat	29903	99.9631	99.9512	99.96	B.1.36	97	100	Turkey, Finland, UK	32	March-10, April-01	47	A2a	1	B.1.36	0.874	A	0.232	A1.6.1.1.2
238	447547	EPI_ISL_447547	Gujarat	29903	99.9799	99.9791	99.98	B.1	98	100	UK, USA, Australia	6733	January-24, April-23	25	A2a	1	B.1	0.992	A	0.233	A1.10
239	447548	EPI_ISL_447548	Gujarat	29903	99.9598	99.9512	99.96	B.1.36	96	100	Turkey, Finland, UK	32	March-10, April-01	47	A2a	1	B.1.36	0.892	A	0.232	A1.6.1.1.1.1
240	447549	EPI_ISL_447549	Gujarat	29903	99.9799	99.986	99.98	B.1	98	100	UK, USA, Australia	6733	January-24, April-23	25	A2a	0.998	B.1	0.828	A	0.232	A1.9.1
241	447550	EPI_ISL_447550	Gujarat	29903	99.9799	99.986	99.98	B.1	96	100	UK, USA, Australia	6733	January-24, April-23	25	A2a	1	B.1	0.845	A	0.234	A1.9
242	447551	EPI_ISL_447551	Gujarat	29903	99.9799	99.986	99.98	B.1	98	100	UK, USA, Australia	6733	January-24, April-23	25	A2a	0.998	B.1	0.828	A	0.232	A1.9.1
245	447554	EPI_ISL_447554	Gujarat	29903	99.9866	99.986	99.99	B.1	99	100	UK, USA, Australia	6733	January-24, April-23	25	A2a	1	B.1	1	A	0.233	A1
246	447555	EPI_ISL_447555	Gujarat	29903	99.9765	99.9791	99.98	B.1.36	78	100	Turkey, Finland, UK	32	March-10, April-01	47	A2a	1	B.1.36	0.515	A	0.233	A1.6.1
247	447556	EPI_ISL_447556	Telangana	29851	99.9766	99.9442	99.98	B.6	100	100	India, Singapore, Australia	221	March-04, April-05	-636	A3	0.318	B.6	0.986	A	0.233	A1
248	447557	EPI_ISL_447557	Telangana	29865	99.9699	99.9512	99.97	B.6	100	100	India, Singapore, Australia	221	March-04, April-05	-636	A3	0.29	B.6	0.999	A	0.233	A1
249	447558	EPI_ISL_447558	Telangana	29865	99.9833	99.9651	99.98	B.6	89	97	India, Singapore, Australia	221	March-04, April-05	-636	A7	0.381	B.6	0.959	A	0.233	A1
250	447559	EPI_ISL_447559	Telangana	29853	99.9766	99.9233	99.98	B.6	100	96	India, Singapore, Australia	221	March-04, April-05	-636	A3	0.305	B.6	0.97	A	0.233	A1
251	447560	EPI_ISL_447560	Telangana	29864	99.9833	99.9512	99.98	B.6	100	100	India, Singapore, Australia	221	March-04, April-05	-636	A3	0.299	B.6	1	A	0.233	A1
252	447561	EPI_ISL_447561	Telangana	29864	99.9732	99.9233	99.97	B.6	100	100	India, Singapore, Australia	221	March-04, April-05	-636	A3	0.299	B.6	0.995	A	0.232	A1
253	447562	EPI_ISL_447562	Telangana	29858	99.9833	99.9512	99.98	B.6	100	100	India, Singapore, Australia	221	March-04, April-05	-636	A3	0.294	B.6	1	A	0.233	A1
255	447564	EPI_ISL_447564	Telangana	29890	99.9833	99.9512	99.98	B.6	100	100	India, Singapore, Australia	221	March-04, April-05	-636	A3	0.322	B.6	1	A	0.233	A1
256	447565	EPI_ISL_447565	Telangana	29834	99.9899	99.9791	99.99	B	100	100	UK, USA, China	1714	December-24, May-18	51	A7	0.39	B.6	0.697	A	0.232	A1
257	447566	EPI_ISL_447566	Telangana	29876	99.9766	99.9442	99.98	B.6	99	100	India, Singapore, Australia	221	March-04, April-05	-636	A3	0.321	B.6	0.986	A	0.233	A1
258	447567	EPI_ISL_447567	Telangana	29865	99.9665	99.9372	99.97	B.6	100	97	India, Singapore, Australia	221	March-04, April-05	-636	A3	0.291	B.6	0.999	A	0.233	A1
265	447574	EPI_ISL_447574	Telangana	29834	99.9832	99.9512	99.98	B.6	100	100	India, Singapore, Australia	221	March-04, April-05	-636	A3	0.284	B.6	1	A	0.233	A1
266	447575	EPI_ISL_447575	Telangana	29892	99.9699	99.9233	99.97	B.6	99	96	India, Singapore, Australia	221	March-04, April-05	-636	A3	0.318	B.6	0.988	A	0.233	A1
268	447577	EPI_ISL_447577	Telangana	29865	99.9799	99.9372	99.98	B.6	100	100	India, Singapore, Australia	221	March-04, April-05	-636	A3	0.284	B.6	0.996	A	0.233	A1
273	447582	EPI_ISL_447582	Telangana	29865	99.9833	99.9512	99.98	B.6	100	100	India, Singapore, Australia	221	March-04, April-05	-636	A3	0.303	B.6	1	A	0.233	A1
275	447584	EPI_ISL_447584	Tamil Nadu	29866	99.9766	99.9302	99.98	B.6	99	96	India, Singapore, Australia	221	March-04, April-05	-636	A3	0.303	B.6	0.998	A	0.233	A1.12
276	447585	EPI_ISL_447585	Tamil Nadu	29868	99.9766	99.9302	99.98	B.6	99	97	India, Singapore, Australia	221	March-04, April-05	-636	A3	0.306	B.6	0.998	A	0.233	A1.12
277	447586	EPI_ISL_447586	Tamil Nadu	29865	99.9699	99.9302	99.97	B.6	99	97	India, Singapore, Australia	221	March-04, April-05	-636	A3	0.286	B.6	0.998	A	0.233	A1.12
279	447847	EPI_ISL_447847	Telangana	29822	99.9732	99.9372	99.97	B.6	100	97	India, Singapore, Australia	221	March-04, April-05	-636	A3	0.271	B.6	0.991	A	0.234	A1
282	447850	EPI_ISL_447850	Telangana	29822	99.9765	99.9442	99.98	B.6	100	100	India, Singapore, Australia	221	March-04, April-05	-636	A3	0.285	B.6	0.986	A	0.233	A1
286	447854	EPI_ISL_447854	Telangana	29825	99.9799	99.9372	99.98	B.6	100	96	India, Singapore, Australia	221	March-04, April-05	-636	A3	0.276	B.6	1	A	0.233	A1
287	447855	EPI_ISL_447855	Telangana	29822	99.9732	99.9233	99.97	B.6	100	100	India, Singapore, Australia	221	March-04, April-05	-636	A7	0.293	B.6	0.997	A	0.232	A1
288	447856	EPI_ISL_447856	Telangana	29822	99.9799	99.9442	99.98	B.6	100	100	India, Singapore, Australia	221	March-04, April-05	-636	A3	0.27	B.6	0.999	A	0.233	A1
289	447857	EPI_ISL_447857	Telangana	29822	99.9732	99.9233	99.97	B.6	100	100	India, Singapore, Australia	221	March-04, April-05	-636	A7	0.272	B.6	0.999	A	0.232	A1
290	447858	EPI_ISL_447858	Telangana	29822	99.9732	99.9302	99.97	B.6	99	96	India, Singapore, Australia	221	March-04, April-05	-636	A3	0.285	B.6	0.995	A	0.233	A1.25
292	447860	EPI_ISL_447860	Telangana	29834	99.9799	99.9512	99.98	B.6	100	100	India, Singapore, Australia	221	March-04, April-05	-636	A3	0.282	B.6	1	A	0.232	A1
293	447861	EPI_ISL_447861	Telangana	29834	99.9832	99.9512	99.98	B.6	100	100	India, Singapore, Australia	221	March-04, April-05	-636	A3	0.284	B.6	1	A	0.233	A1
294	447862	EPI_ISL_447862	Telangana	29840	99.9732	99.9233	99.97	B.6	100	100	India, Singapore, Australia	221	March-04, April-05	-636	A7	0.276	B.6	0.999	A	0.233	A1
295	447863	EPI_ISL_447863	Telangana	29822	99.9732	99.9233	99.97	B.6	99	97	India, Singapore, Australia	221	March-04, April-05	-636	A3	0.296	B.6	0.983	A	0.233	A1
297	447865	EPI_ISL_447865	Telangana	29834	99.9765	99.9233	99.98	B.6	100	96	India, Singapore, Australia	221	March-04, April-05	-636	A3	0.283	B.6	0.985	A	0.234	A1
299	450321	EPI_ISL_450321	Maharashtra	29821	99.9765	99.9233	99.98	B.6	100	97	India, Singapore, Australia	221	March-04, April-05	-636	A3	0.272	B.6	0.978	A	0.233	A1
300	450322	EPI_ISL_450322	Maharashtra	29821	99.9799	99.9512	99.98	B.6	100	100	India, Singapore, Australia	221	March-04, April-05	-636	A3	0.269	B.6	1	A	0.232	A1
301	450323	EPI_ISL_450323	Maharashtra	29829	99.9866	99.986	99.99	B.1	100	100	UK, USA, Australia	7440	January-24, May-21	48	A2a	1	B.1	1	A	0.233	A1
304	450326	EPI_ISL_450326	Telangana	29830	99.9732	99.9233	99.91	B.6	100	100	India, Singapore, Australia	221	March-04, April-05	-636	A7	0.27	B.6	0.997	A	0.233	A1
305	450327	EPI_ISL_450327	Telangana	29859	99.9833	99.9512	99.98	B.6	100	100	India, Singapore, Australia	221	March-04, April-05	-636	A3	0.289	B.6	1	A	0.233	A1
306	450328	EPI_ISL_450328	Telangana	29834	99.9799	99.9512	99.98	B.6	100	100	India, Singapore, Australia	221	March-04, April-05	-636	A3	0.282	B.6	1	A	0.232	A1
307	450329	EPI_ISL_450329	Telangana	29834	99.9832	99.9512	99.98	B.6	100	100	India, Singapore, Australia	221	March-04, April-05	-636	A3	0.284	B.6	1	A	0.233	A1
308	450330	EPI_ISL_450330	Telangana	29830	99.9732	99.9372	99.97	B.6	100	100	India, Singapore, Australia	221	March-04, April-05	-636	A3	0.273	B.6	0.99	A	0.232	A1
309	450331	EPI_ISL_450331	Telangana	29836	99.9832	99.9512	99.98	B.6	100	100	India, Singapore, Australia	221	March-04, April-05	-636	A3	0.277	B.6	1	A	0.233	A1
310	450332	EPI_ISL_450332	Telangana	29852	99.9799	99.9372	99.98	B.6	99	97	India, Singapore, Australia	221	March-04, April-05	-636	A3	0.296	B.6	1	A	0.233	A1
315	450785	EPI_ISL_450785	Gujarat	29903	99.9531	99.9023	99.95	B.1	100	100	UK, USA, Australia	6733	January-24, April-23	31	A2a	0.989	B.1.1	0.959	A	0.232	A1.14.1
316	450786	EPI_ISL_450786	Gujarat	29903	99.9497	99.8953	99.95	B.1	100	100	UK, USA, Australia	6733	January-24, April-23	31	A2a	0.988	B.1.1	0.957	A	0.232	A1.14.1
318	450788	EPI_ISL_450788	Gujarat	29903	99.9765	99.9581	99.98	B.1	96	100	UK, USA, Australia	6733	January-24, April-23	31	A2a	0.999	B.1	0.995	A	0.233	A1.5
320	450790	EPI_ISL_450790	Gujarat	29903	99.9732	99.9441	99.89	A	99	100	China, South_Korea, USA	241	January-05, April-06	48	B4	0.965	A.p7	0.715	A	0.233	A1.26
321	450791	EPI_ISL_450791	Gujarat	29903	99.9732	99.9301	99.97	A	100	100	China, South_Korea, USA	241	January-05, April-06	48	B4	0.992	A.p7	0.876	A	0.231	A1.26
322	451149	EPI_ISL_451149	Gujarat	29903	99.9564	99.9512	99.96	B.1.36	97	100	Turkey, Finland, UK	32	March-10, April-01	53	A2a	0.968	B.1.36	0.871	A	0.233	A1.6.1.1.1.4
324	451151	EPI_ISL_451151	Gujarat	29903	99.9598	99.9651	99.96	B.1.36	99	100	Turkey, Finland, UK	32	March-10, April-01	53	A2a	0.971	B.1.36	0.889	A	0.233	A1.6.1.1.1.4
326	451153	EPI_ISL_451153	Gujarat	29903	99.9598	99.9512	99.96	B.1.36	95	100	Turkey, Finland, UK	32	March-10, April-01	53	A2a	0.999	B.1.36	0.805	A	0.232	A1.6.1.1.1.3
327	451154	EPI_ISL_451154	Gujarat	29903	99.9698	99.9302	99.92	B.6	100	100	Australia, Singapore, USA	94	March-04, April-15	39	A7	0.276	B.6	0.983	A	0.232	A1.27
329	451156	EPI_ISL_451156	Gujarat	29903	99.9698	99.9302	99.92	B.6	100	100	Australia, Singapore, USA	94	March-04, April-15	39	A7	0.275	B.6	0.983	A	0.232	A1.27
331	451158	EPI_ISL_451158	Gujarat	29903	99.9832	99.986	99.98	B.1	98	100	UK, USA, Australia	6733	January-24, April-23	31	A2a	1	B.1	0.988	A	0.233	A1.13
332	451159	EPI_ISL_451159	Gujarat	29903	99.9698	99.9372	99.97	B.6	100	100	Australia, Singapore, USA	94	March-04, April-15	39	A7	0.281	B.6	0.984	A	0.232	A1.27
333	451160	EPI_ISL_451160	Gujarat	29903	99.9765	99.9791	99.98	B.1.36	73	100	Turkey, Finland, UK	32	March-10, April-01	53	A2a	1	B.1.36	0.515	A	0.233	A1.6.1
334	451161	EPI_ISL_451161	Gujarat	29903	99.9698	99.9232	99.88	B.6	100	100	Australia, Singapore, USA	94	March-04, April-15	39	A7	0.27	B.6	0.978	A	0.23	A1.27
338	452192	EPI_ISL_452192	Maharashtra	29805	99.9631	99.9512	99.97	B.1.1	95	95	UK, Australia, USA	6287	February-15, May-20	49	A2a	0.998	B.1.1	0.996	A	0.232	A1.14
344	452199	EPI_ISL_452199	Maharashtra	29799	99.9564	99.9302	99.94	B.1.1	97	95	UK, Australia, USA	6287	February-15, May-20	49	A2a	0.994	B.1.1	0.981	A	0.232	A1.14
349	452204	EPI_ISL_452204	Maharashtra	29799	99.9732	99.9651	99.96	A	100	100	China, South_Korea, USA	223	January-05, April-23	76	B4	0.892	A.p7	0.56	A	0.232	A1.28
350	452205	EPI_ISL_452205	Maharashtra	29805	99.9698	99.9651	99.98	A	100	100	China, South_Korea, USA	223	January-05, April-23	76	B4	0.905	A.p7	0.571	A	0.232	A1.29
351	452207	EPI_ISL_452207	Maharashtra	29805	99.9631	99.9512	99.97	B.1.1	95	94	UK, Australia, USA	6287	February-15, May-20	49	A2a	0.998	B.1.1	0.996	A	0.232	A1.14
352	452208	EPI_ISL_452208	Maharashtra	29805	99.9765	99.9512	99.98	B.6	100	100	India, Singapore, Australia	221	March-04, April-05	-636	A6	0.284	B.6	1	A	0.234	A1
353	452209	EPI_ISL_452209	Maharashtra	29805	99.9664	99.9372	99.98	B.6	100	100	India, Singapore, Australia	221	March-04, April-05	-636	A6	0.29	B.6	1	A	0.233	A1
355	452211	EPI_ISL_452211	Maharashtra	29805	99.9631	99.9512	99.97	B.1.1	95	93	UK, Australia, USA	6287	February-15, May-20	49	A2a	0.998	B.1.1	0.996	A	0.232	A1.14
357	452213	EPI_ISL_452213	Maharashtra	29805	99.9664	99.9442	99.97	B.4	96	100	Australia, UK, Turkey	258	January-18, April-14	85	A3	0.89	B.4	0.878	A	0.234	A1.15
358	452214	EPI_ISL_452214	Maharashtra	29805	99.9698	99.9791	99.98	B.1	100	100	UK, USA, Australia	7440	January-24, May-21	48	A2a	1	B.1	0.977	A	0.234	A1.16
362	452790	EPI_ISL_452790	Madhya Pradesh	29808	99.7769	99.6633	99.96	B.1	95	96	UK, USA, Australia	7440	January-24, May-21	48	A2a	0.918	B.1	0.754	A	0.235	A1
365	452793	EPI_ISL_452793	Madhya Pradesh	29833	99.8683	99.7545	99.93	B.6	100	100	India, Singapore, Australia	221	March-04, April-05	-636	A3	0.333	B.6	0.807	A	0.232	A1.27
369	454525	EPI_ISL_454525	Maharashtra	29903	99.916	99.8181	99.73	B.4	89	100	Australia, UK, Turkey	258	January-18, April-14	51	A3	0.839	B.4	0.639	A	0.233	A1.15
370	454526	EPI_ISL_454526	Maharashtra	29903	99.943	99.9093	99.95	B.4	88	100	Australia, UK, Turkey	258	January-18, April-14	51	A3	0.884	B.4	0.878	A	0.234	A1.15
373	454529	EPI_ISL_454529	Maharashtra	29903	99.9731	99.9791	99.91	B.1	100	100	UK, USA, Australia	7440	January-24, May-21	14	A2a	0.999	B.1	0.968	A	0.234	A1.16
374	454531	EPI_ISL_454531	Maharashtra	29903	99.9698	99.9651	99.92	A	100	100	China, South_Korea, USA	223	January-05, April-23	42	B4	0.903	A.p7	0.569	A	0.232	A1.28
375	454532	EPI_ISL_454532	Maharashtra	29903	99.9597	99.9581	99.89	B.1	97	95	UK, USA, Australia	7440	January-24, May-21	14	A2a	0.998	B.1	0.963	A	0.234	A1
376	454533	EPI_ISL_454533	Maharashtra	29903	99.9362	99.9511	99.9	B.1.5	81	100	UK, Spain, Australia	710	February-26, May-10	25	A2a	1	B.1.5	0.522	A	0.233	A1
377	454534	EPI_ISL_454534	Maharashtra	29903	99.9293	99.9581	99.98	A	100	100	China, South_Korea, USA	223	January-05, April-23	42	B4	0.45	A.p7	0.395	A	0.233	A1.29
382	454543	EPI_ISL_454543	Maharashtra	29903	99.9496	99.8883	99.87	B.6	100	100	India, Singapore, Australia	221	March-04, April-05	-670	A6	0.331	B.6	0.967	A	0.234	A1
384	454546	EPI_ISL_454546	Maharashtra	29903	99.963	99.8951	99.9	B.6	99	97	India, Singapore, Australia	221	March-04, April-05	-670	A6	0.326	B.6	0.955	A	0.236	A1
385	454547	EPI_ISL_454547	Maharashtra	29903	99.9664	99.9233	99.97	B.6	100	100	India, Singapore, Australia	221	March-04, April-05	-670	A6	0.298	B.6	0.998	A	0.233	A1
389	454557	EPI_ISL_454557	Maharashtra	29903	99.9396	99.9233	99.95	B.1.1	96	94	UK, Australia, USA	6287	February-15, May-20	15	A2a	0.998	B.1.1	0.981	A	0.232	A1.14
393	454565	EPI_ISL_454565	Maharashtra	29903	99.943	99.9233	99.95	B.1.1	96	96	UK, Australia, USA	6287	February-15, May-20	15	A2a	1	B.1.1	0.975	A	0.233	A1
398	454570	EPI_ISL_454570	Maharashtra	29903	99.9698	99.9651	99.97	B.1	100	100	UK, USA, Australia	7440	January-24, May-21	14	A2a	0.999	B.1	0.962	A	0.235	A1.16
401	454832	EPI_ISL_454832	Rajasthan	29877	99.9833	99.9512	99.98	B.6	100	100	India, Singapore, Australia	221	March-04, April-05	-636	A3	0.302	B.6	1	A	0.233	A1
402	454833	EPI_ISL_454833	Rajasthan	29865	99.9698	99.9442	99.97	B.6	100	100	India, Singapore, Australia	221	March-04, April-05	-636	A3	0.327	B.6	0.972	A	0.233	A1
404	454862	EPI_ISL_454862	Haryana	29903	99.9698	99.9302	99.97	B.6	100	100	India, Singapore, Australia	221	March-04, April-05	-670	A6	0.244	B.6	1	A	0.233	A1
406	454867	EPI_ISL_454867	Haryana	29903	99.9765	99.9442	99.98	B.6	100	100	India, Singapore, Australia	221	March-04, April-05	-670	A6	0.245	B.6	1	A	0.234	A1
407	455015	EPI_ISL_455015	Gujarat	29903	99.9731	99.9087	99.8	A	100	100	China, South_Korea, USA	223	January-05, April-23	42	B4	0.906	A.p7	0.545	A	0.232	A1.26
408	455016	EPI_ISL_455016	Gujarat	29903	99.9732	99.9442	99.97	A	100	100	China, South_Korea, USA	223	January-05, April-23	42	B4	0.994	A.p7	0.827	A	0.233	A1.26
411	455019	EPI_ISL_455019	Gujarat	29903	99.9832	99.986	99.98	B.1	96	96	UK, USA, Australia	7440	January-24, May-21	14	A2a	1	B.1	0.989	A	0.233	A1.13
413	455021	EPI_ISL_455021	Gujarat	29903	99.9732	99.9791	99.97	B.1.36	77	100	Saudi_Arabia, UK, Turkey	159	March-10, May-07	28	A2a	1	B.1.36	0.518	A	0.233	A1.6.1.4
414	455022	EPI_ISL_455022	Gujarat	29903	99.9832	99.986	99.98	B.1	96	96	UK, USA, Australia	7440	January-24, May-21	14	A2a	1	B.1	0.989	A	0.233	A1.13
416	455024	EPI_ISL_455024	Gujarat	29903	99.9832	99.986	99.98	B.1	96	96	UK, USA, Australia	7440	January-24, May-21	14	A2a	1	B.1	0.989	A	0.233	A1.13
417	455025	EPI_ISL_455025	Gujarat	29903	99.9799	99.9721	99.98	B.1	98	96	UK, USA, Australia	7440	January-24, May-21	14	A2a	1	B.1	0.985	A	0.233	A1.13
419	455027	EPI_ISL_455027	Gujarat	29903	99.9732	99.9791	99.97	B.1.36	76	100	Saudi_Arabia, UK, Turkey	159	March-10, May-07	28	A2a	1	B.1.36	0.551	A	0.233	A1.6.1.4
422	455643	EPI_ISL_455643	West Bengal	29903	99.9866	99.986	99.99	B.1	99	100	UK, USA, Australia	7440	January-24, May-21	12	A2a	1	B.1	1	A	0.233	A1
423	455644	EPI_ISL_455644	West Bengal	29903	99.9698	99.9512	99.97	B.1	97	97	UK, USA, Australia	7440	January-24, May-21	12	A2a	0.999	B.1	0.969	A	0.233	A1
432	455653	EPI_ISL_455653	West Bengal	29903	99.9732	99.9791	99.97	B.1	96	95	UK, USA, Australia	7440	January-24, May-21	12	A2a	1	B.1	0.947	A	0.233	A1.30
434	455656	EPI_ISL_455656	West Bengal	29903	99.9665	99.9233	99.97	B.6	100	100	India, Singapore, Australia	221	March-04, April-05	-672	A3	0.282	B.6	0.997	A	0.234	A1
437	455660	EPI_ISL_455660	West Bengal	29903	99.9699	99.9372	99.97	B.1	99	100	UK, USA, Australia	7440	January-24, May-21	12	A2a	1	B.1	0.876	A	0.233	A1.17
440	455667	EPI_ISL_455667	West Bengal	29903	99.9732	99.986	99.97	B.1	94	95	UK, USA, Australia	7440	January-24, May-21	12	A2a	0.992	B.1	0.944	A	0.233	A1.20
446	455673	EPI_ISL_455673	West Bengal	29903	99.9732	99.9721	99.93	B.1	95	95	UK, USA, Australia	7440	January-24, May-21	12	A2a	0.992	B.1	0.945	A	0.233	A1.20
447	455674	EPI_ISL_455674	West Bengal	29903	99.9732	99.986	99.97	B.1	95	95	UK, USA, Australia	7440	January-24, May-21	12	A2a	0.992	B.1	0.945	A	0.233	A1.20
448	455675	EPI_ISL_455675	West Bengal	29903	99.9732	99.9791	99.97	B.1	96	95	UK, USA, Australia	7440	January-24, May-21	12	A2a	1	B.1	0.95	A	0.233	A1.30
449	455676	EPI_ISL_455676	West Bengal	29903	99.9732	99.986	99.97	B.1	95	95	UK, USA, Australia	7440	January-24, May-21	12	A2a	0.992	B.1	0.945	A	0.233	A1.20
450	455678	EPI_ISL_455678	West Bengal	29903	99.9699	99.9372	99.97	B.1	95	100	UK, USA, Australia	7440	January-24, May-21	12	A2a	1	B.1	0.876	A	0.233	A1.17
451	455679	EPI_ISL_455679	West Bengal	29903	99.9765	99.9581	99.98	B.1	99	100	UK, USA, Australia	7440	January-24, May-21	12	A2a	0.989	B.1	0.973	A	0.233	A1
462	455764	EPI_ISL_455764	Odisha	29690	99.9697	99.9512	99.97	A	100	100	China, South_Korea, USA	223	January-05, April-23	76	B4	0.597	A.p7	0.533	A	0.233	A1.31
464	455766	EPI_ISL_455766	Odisha	29689	99.9697	99.9512	99.97	A	100	100	China, South_Korea, USA	223	January-05, April-23	76	B4	0.595	A.p7	0.533	A	0.233	A1.31
465	455767	EPI_ISL_455767	Odisha	29693	99.9697	99.9512	99.97	A	100	100	China, South_Korea, USA	223	January-05, April-23	76	B4	0.595	A.p7	0.521	A	0.233	A1.31
469	455775	EPI_ISL_455775	Odisha	29841	99.9765	99.9791	99.98	B.1.36	69	100	Saudi_Arabia, UK, Turkey	159	March-10, May-07	62	A2a	1	B.1	0.502	A	0.233	A1.6.1
471	455777	EPI_ISL_455777	Odisha	29688	99.9764	99.9791	99.98	B.1.36	77	100	Saudi_Arabia, UK, Turkey	159	March-10, May-07	62	A2a	1	B.1	0.548	A	0.233	A1.6.1
472	455778	EPI_ISL_455778	Odisha	29862	99.9765	99.9791	99.98	B.1.36	82	100	Saudi_Arabia, UK, Turkey	159	March-10, May-07	62	A2a	1	B.1.36	0.536	A	0.233	A1.6.1
473	455779	EPI_ISL_455779	Odisha	29813	99.9765	99.9791	99.98	B.1.36	78	100	Saudi_Arabia, UK, Turkey	159	March-10, May-07	62	A2a	1	B.1.36	0.524	A	0.234	A1.6.1
474	455780	EPI_ISL_455780	Odisha	29824	99.9765	99.9791	99.98	B.1.36	81	100	Saudi_Arabia, UK, Turkey	159	March-10, May-07	62	A2a	1	B.1	0.514	A	0.234	A1.6.1
475	455782	EPI_ISL_455782	Odisha	29685	99.9729	99.979	99.97	B.1.36	79	100	Saudi_Arabia, UK, Turkey	159	March-10, May-07	62	A2a	1	B.1	0.609	A	0.233	A1.6.1
477	455784	EPI_ISL_455784	Odisha	29685	99.973	99.9651	99.9	B.1.36	75	100	Saudi_Arabia, UK, Turkey	159	March-10, May-07	62	A2a	0.999	B.1	0.544	A	0.236	A1.6.1
478	455786	EPI_ISL_455786	Odisha	29685	99.9831	99.986	99.98	B.1	96	100	UK, USA, Australia	7440	January-24, May-21	48	A2a	1	B.1	0.989	A	0.233	A1
479	455787	EPI_ISL_455787	Odisha	29690	99.9865	99.986	99.99	B.1	100	100	UK, USA, Australia	7440	January-24, May-21	48	A2a	1	B.1	1	A	0.233	A1
480	458030	EPI_ISL_458030	Tamil Nadu	29824	99.9698	99.9581	99.97	B.1.1	95	95	UK, Australia, USA	6287	February-15, May-20	49	A2a	1	B.1.1	0.987	A	0.232	A1.4
481	458031	EPI_ISL_458031	Tamil Nadu	29824	99.9698	99.9512	99.97	B.1.1	95	96	UK, Australia, USA	6287	February-15, May-20	49	A2a	1	B.1.1	0.999	A	0.232	A1.4.1
482	458032	EPI_ISL_458032	Tamil Nadu	29824	99.9732	99.9651	99.97	B.1.1	96	94	UK, Australia, USA	6287	February-15, May-20	49	A2a	1	B.1.1	1	A	0.232	A1.4
483	458033	EPI_ISL_458033	Tamil Nadu	29824	99.9698	99.9512	99.97	B.1.1	95	96	UK, Australia, USA	6287	February-15, May-20	49	A2a	1	B.1.1	0.999	A	0.232	A1.4.1
484	458034	EPI_ISL_458034	Tamil Nadu	29824	99.9698	99.9512	99.97	B.1.1	95	96	UK, Australia, USA	6287	February-15, May-20	49	A2a	1	B.1.1	0.999	A	0.232	A1.4.1
487	458037	EPI_ISL_458037	Tamil Nadu	29824	99.9665	99.9651	99.97	B.1.1	99	95	UK, Australia, USA	6287	February-15, May-20	49	A2a	1	B.1.1	0.999	A	0.232	A1.4.2
488	458038	EPI_ISL_458038	Tamil Nadu	29824	99.9631	99.9512	99.96	B.1.1	98	94	UK, Australia, USA	6287	February-15, May-20	49	A2a	0.996	B.1.1	0.994	A	0.232	A1.4.3
489	458039	EPI_ISL_458039	Tamil Nadu	29824	99.9598	99.9512	99.96	B.1.1	98	94	UK, Australia, USA	6287	February-15, May-20	49	A2a	0.995	B.1.1	0.91	A	0.232	A1.4.3
490	458040	EPI_ISL_458040	Tamil Nadu	29824	99.9631	99.9442	99.96	B.1.1	97	94	UK, Australia, USA	6287	February-15, May-20	49	A2a	1	B.1.1	0.989	A	0.232	A1.4.1
491	458041	EPI_ISL_458041	Tamil Nadu	29824	99.9598	99.9372	99.96	B.1.1	96	94	UK, Australia, USA	6287	February-15, May-20	49	A2a	0.996	B.1.1	0.989	A	0.231	A1.4.3
494	458044	EPI_ISL_458044	Tamil Nadu	29824	99.9665	99.9651	99.97	B.1.1	99	95	UK, Australia, USA	6287	February-15, May-20	49	A2a	1	B.1.1	0.999	A	0.232	A1.4.2
496	458046	EPI_ISL_458046	Telangana	29824	99.9497	99.9233	99.95	B.1.1.8	87	90	UK, Australia, Gambia	65	March-17, April-28	71	A2a	0.987	B.1.1.8	0.866	A	0.231	A1.21
498	458048	EPI_ISL_458048	Telangana	29824	99.9497	99.9233	99.95	B.1.1.8	87	90	UK, Australia, Gambia	65	March-17, April-28	71	A2a	0.987	B.1.1.8	0.866	A	0.231	A1.21
503	458053	EPI_ISL_458053	Telangana	29824	99.9732	99.9791	99.97	B.1	100	100	UK, USA, Australia	7440	January-24, May-21	48	A2a	0.999	B.1	0.981	A	0.232	A1.16
509	458059	EPI_ISL_458059	Telangana	29824	99.9497	99.9302	99.95	B.1.1	95	100	UK, Australia, USA	6287	February-15, May-20	49	A2a	0.997	B.1.1	0.989	A	0.23	A1.14.2
510	458060	EPI_ISL_458060	Telangana	29824	99.9531	99.9233	99.95	B.1.1	98	94	UK, Australia, USA	6287	February-15, May-20	49	A2a	0.998	B.1.1	0.991	A	0.231	A1.14.2
511	458061	EPI_ISL_458061	Telangana	29824	99.9531	99.9372	99.95	B.1.1	99	94	UK, Australia, USA	6287	February-15, May-20	49	A2a	0.98	B.1.1	0.993	A	0.231	A1.14.2
512	458062	EPI_ISL_458062	Telangana	29824	99.9665	99.9163	99.97	B.6	100	100	India, Singapore, Australia	221	March-04, April-05	-636	A7	0.253	B.6	0.979	A	0.233	A1
513	458063	EPI_ISL_458063	Telangana	29824	99.9698	99.9233	99.97	B.6	100	100	India, Singapore, Australia	221	March-04, April-05	-636	A7	0.28	B.6	0.998	A	0.233	A1.18
514	458064	EPI_ISL_458064	Telangana	29824	99.9732	99.9581	99.97	B.1	96	95	UK, USA, Australia	7440	January-24, May-21	48	A2a	0.999	B.1	0.925	A	0.233	A1.22
515	458065	EPI_ISL_458065	Telangana	29824	99.9732	99.9581	99.97	B.1	96	95	UK, USA, Australia	7440	January-24, May-21	48	A2a	0.999	B.1	0.925	A	0.233	A1.22
516	458066	EPI_ISL_458066	Telangana	29824	99.9832	99.9512	99.98	B.6	100	100	India, Singapore, Australia	221	March-04, April-05	-636	A3	0.275	B.6	1	A	0.233	A1
519	458069	EPI_ISL_458069	Telangana	29824	99.9732	99.9233	99.97	B.6	100	100	India, Singapore, Australia	221	March-04, April-05	-636	A7	0.259	B.6	0.999	A	0.233	A1
521	458071	EPI_ISL_458071	Telangana	29824	99.9799	99.9442	99.98	B.6	100	97	India, Singapore, Australia	221	March-04, April-05	-636	A2a	0.404	B.6	0.804	A	0.233	A1
522	458072	EPI_ISL_458072	Telangana	29839	99.9665	99.9233	99.97	B.6	99	97	India, Singapore, Australia	221	March-04, April-05	-636	A3	0.307	B.6	0.986	A	0.232	A1.25
523	458073	EPI_ISL_458073	Telangana	29839	99.9665	99.9163	99.97	B.6	100	100	India, Singapore, Australia	221	March-04, April-05	-636	A3	0.272	B.6	0.99	A	0.232	A1
524	458074	EPI_ISL_458074	Telangana	29839	99.9631	99.9163	99.96	B.6	100	100	India, Singapore, Australia	221	March-04, April-05	-636	A7	0.283	B.6	0.989	A	0.232	A1.18
526	458076	EPI_ISL_458076	Telangana	29839	99.9698	99.9163	99.97	B.6	100	100	India, Singapore, Australia	221	March-04, April-05	-636	A3	0.271	B.6	0.997	A	0.233	A1
528	458080	EPI_ISL_458080	Telangana	29824	100	100	100	B	99	100	UK, USA, China	1714	December-24, May-18	51	A7	0.388	B	1	A	0.234	A1
530	458087	EPI_ISL_458087	Gujarat	29903	99.9765	99.9791	99.98	B.1.36	73	100	Turkey, Finland, UK	32	March-10, April-01	53	A2a	1	B.1.36	0.515	A	0.233	A1.6.1
531	458088	EPI_ISL_458088	Gujarat	29903	99.9665	99.9651	99.97	B.1.36	97	100	Saudi_Arabia, UK, Turkey	159	March-10, May-07	28	A2a	1	B.1.36	0.903	A	0.232	A1.6.1.1.1
532	458089	EPI_ISL_458089	Gujarat	29903	99.9732	99.9721	99.97	B.1.36	77	100	Saudi_Arabia, UK, Turkey	159	March-10, May-07	28	A2a	1	B.1	0.499	A	0.233	A1.6.1
537	458094	EPI_ISL_458094	Gujarat	29903	99.9665	99.9651	99.97	B.1.36	97	100	Saudi_Arabia, UK, Turkey	159	March-10, May-07	28	A2a	1	B.1.36	0.903	A	0.232	A1.6.1.1.1
538	458095	EPI_ISL_458095	Gujarat	29903	99.9698	99.9651	99.97	B.1.36	98	100	Saudi_Arabia, UK, Turkey	159	March-10, May-07	28	A2a	1	B.1.36	0.883	A	0.232	A1.6.1.1
540	458097	EPI_ISL_458097	Gujarat	29903	99.9631	99.9581	99.96	B.1.36	99	100	Saudi_Arabia, UK, Turkey	159	March-10, May-07	28	A2a	1	B.1.36	0.895	A	0.231	A1.6.1.1.1
541	458098	EPI_ISL_458098	Gujarat	29903	99.9665	99.9651	99.97	B.1.36	97	100	Saudi_Arabia, UK, Turkey	159	March-10, May-07	28	A2a	1	B.1.36	0.903	A	0.232	A1.6.1.1.1
547	458104	EPI_ISL_458104	Gujarat	29903	99.9799	99.9721	99.98	B.1	97	96	UK, USA, Australia	7440	January-24, May-21	14	A2a	1	B.1	1	A	0.232	A1.11
548	458105	EPI_ISL_458105	Gujarat	29903	99.9832	99.9721	99.98	B.1	96	97	UK, USA, Australia	7440	January-24, May-21	14	A2a	1	B.1	1	A	0.233	A1.11
549	458106	EPI_ISL_458106	Gujarat	29903	99.9799	99.9721	99.98	B.1	95	96	UK, USA, Australia	7440	January-24, May-21	14	A2a	1	B.1	0.947	A	0.233	A1.11
550	458107	EPI_ISL_458107	Gujarat	29903	99.9765	99.9721	99.98	B.1	95	94	UK, USA, Australia	7440	January-24, May-21	14	A2a	0.999	B.1	0.928	A	0.233	A1.11
551	458108	EPI_ISL_458108	Gujarat	29903	99.9799	99.986	99.98	B.1	100	100	UK, USA, Australia	7440	January-24, May-21	14	A2a	1	B.1	0.998	A	0.233	A1.16
552	458109	EPI_ISL_458109	Gujarat	29903	99.9832	99.9581	99.79	B.1	95	100	UK, USA, Australia	7440	January-24, May-21	14	A2a	0.995	B.1	0.869	A	0.233	A1.14
555	458112	EPI_ISL_458112	Gujarat	29903	99.9564	99.9512	99.96	B.1.36	100	100	Saudi_Arabia, UK, Turkey	159	March-10, May-07	28	A2a	1	B.1.36	0.807	A	0.231	A1.6.1.1.1.3
557	458298	EPI_ISL_458298	Telangana	29824	99.9765	99.9233	99.98	B	100	100	UK, USA, China	1714	December-24, May-18	51	A3	0.283	B.6	0.766	A	0.234	A1
559	459913	EPI_ISL_459913	Delhi	29862	99.896	99.7558	99.9	B.1.1	96	94	UK, Australia, USA	6287	February-15, May-20	49	A2a	0.753	B.1.1	0.817	A	0.234	A1
561	459915	EPI_ISL_459915	Delhi	29903	99.9498	99.8884	99.95	B.6	100	100	India, Singapore, Australia	221	March-04, April-05	-665	A3	0.289	B.6	0.999	A	0.233	A1
562	459916	EPI_ISL_459916	Delhi	29870	99.9431	99.8744	99.94	B.1.1	95	95	UK, Australia, USA	6287	February-15, May-20	49	A2	0.271	B.1.1	0.551	A	0.231	A1
563	459917	EPI_ISL_459917	Delhi	29903	99.9363	99.8603	99.94	B.6	100	100	India, Singapore, Australia	221	March-04, April-05	-665	A7	0.271	B.6	0.934	A	0.232	A1
564	459918	EPI_ISL_459918	Delhi	29903	99.9331	99.8535	99.93	B.6	100	100	India, Singapore, Australia	221	March-04, April-05	-665	A3	0.263	B.6	0.944	A	0.234	A1
565	459919	EPI_ISL_459919	Delhi	29903	99.9599	99.8953	99.96	B.6	100	100	India, Singapore, Australia	221	March-04, April-05	-665	A3	0.294	B.6	0.998	A	0.233	A1
566	459920	EPI_ISL_459920	Delhi	29903	99.9465	99.8674	99.95	B.6	100	100	India, Singapore, Australia	221	March-04, April-05	-665	A3	0.29	B.6	0.996	A	0.232	A1
567	459921	EPI_ISL_459921	Delhi	29903	99.9465	99.8884	99.95	B.6	100	100	India, Singapore, Australia	221	March-04, April-05	-665	A3	0.288	B.6	0.724	A	0.232	A1
568	459922	EPI_ISL_459922	Delhi	29903	99.9364	99.8605	99.94	B.6	100	100	India, Singapore, Australia	221	March-04, April-05	-665	A3	0.28	B.6	0.982	A	0.233	A1
569	459923	EPI_ISL_459923	Delhi	29903	99.9264	99.8395	99.93	B.6	100	100	India, Singapore, Australia	221	March-04, April-05	-665	A3	0.272	B.6	0.969	A	0.232	A1
570	459924	EPI_ISL_459924	Delhi	29903	99.9331	99.8605	99.93	B.1.1	96	94	UK, Australia, USA	6287	February-15, May-20	20	A2a	0.691	B.1.1	0.738	A	0.231	A1
571	459926	EPI_ISL_459926	Delhi	29903	99.8829	99.7488	99.88	B.6	99	100	India, Singapore, Australia	221	March-04, April-05	-665	A3	0.3	B.6	0.921	A	0.23	A1
572	459927	EPI_ISL_459927	Delhi	29903	99.913	99.8186	99.91	B.6	100	100	India, Singapore, Australia	221	March-04, April-05	-665	A7	0.314	B.6	0.952	A	0.232	A1
573	459932	EPI_ISL_459932	Delhi	29903	99.8661	99.686	99.87	B.6	100	100	India, Singapore, Australia	221	March-04, April-05	-665	A3	0.269	B.6	0.92	A	0.233	A1
574	459933	EPI_ISL_459933	Delhi	29903	99.9164	99.8326	99.92	B.6	100	100	India, Singapore, Australia	221	March-04, April-05	-665	A3	0.265	B.6	0.91	A	0.233	A1
575	459934	EPI_ISL_459934	Delhi	29903	99.9164	99.8186	99.92	B.6	100	100	India, Singapore, Australia	221	March-04, April-05	-665	A3	0.28	B.6	0.912	A	0.232	A1
576	459935	EPI_ISL_459935	Delhi	29903	99.903	99.8326	99.9	B.6	100	100	India, Singapore, Australia	221	March-04, April-05	-665	A3	0.311	B.6	0.949	A	0.231	A1
577	459937	EPI_ISL_459937	Delhi	29903	99.9261	99.8182	99.93	B.6	100	100	India, Singapore, Australia	221	March-04, April-05	-665	A3	0.253	B.6	0.969	A	0.236	A1
578	459938	EPI_ISL_459938	Delhi	29903	99.9123	99.8246	99.95	B.6	99	100	India, Singapore, Australia	221	March-04, April-05	-665	A3	0.271	B.6	0.886	A	0.234	A1
579	459939	EPI_ISL_459939	Delhi	29903	99.9192	99.825	99.95	B.6	100	100	India, Singapore, Australia	221	March-04, April-05	-665	A3	0.252	B.6	0.876	A	0.232	A1
580	459940	EPI_ISL_459940	Delhi	29903	99.8963	99.7907	99.9	B.6	100	100	India, Singapore, Australia	221	March-04, April-05	-665	A3	0.24	B.6	0.89	A	0.234	A1
581	459941	EPI_ISL_459941	Delhi	29903	99.9097	99.8186	99.91	B.6	100	100	India, Singapore, Australia	221	March-04, April-05	-665	A3	0.284	B.6	0.978	A	0.233	A1
582	459942	EPI_ISL_459942	Delhi	29903	99.9331	99.8814	99.93	B.6	100	100	India, Singapore, Australia	221	March-04, April-05	-665	A3	0.29	B.6	0.991	A	0.233	A1
583	459943	EPI_ISL_459943	Delhi	29903	99.9164	99.8605	99.92	B.6	100	100	India, Singapore, Australia	221	March-04, April-05	-665	A3	0.274	B.6	0.948	A	0.232	A1
587	461481	EPI_ISL_461481	Gujarat	29903	99.9799	99.986	99.98	B.1	100	100	UK, USA, Australia	7440	January-24, May-21	19	A2a	1	B.1	0.998	A	0.233	A1.16
589	461483	EPI_ISL_461483	Gujarat	29903	99.9799	99.986	99.98	B.1	100	100	UK, USA, Australia	7440	January-24, May-21	19	A2a	1	B.1	0.999	A	0.233	A1.16
596	461490	EPI_ISL_461490	Gujarat	29903	99.9799	99.986	99.98	B.1	100	100	UK, USA, Australia	7440	January-24, May-21	19	A2a	1	B.1	0.937	A	0.232	A1.19
599	461493	EPI_ISL_461493	Gujarat	29903	99.9732	99.9721	99.97	B.1	100	100	UK, USA, Australia	7440	January-24, May-21	19	A2a	1	B.1	0.803	A	0.233	A1.16
602	461496	EPI_ISL_461496	Gujarat	29903	99.9765	99.9721	99.98	B.1	100	100	UK, USA, Australia	7440	January-24, May-21	19	A2a	1	B.1	0.803	A	0.233	A1.16
606	461500	EPI_ISL_461500	Gujarat	29903	99.9631	99.9581	99.96	B.1.36	96	100	Saudi_Arabia, UK, Turkey	159	March-10, May-07	33	A2a	1	B.1.36	0.907	A	0.23	A1.6.1.1.1
609	461503	EPI_ISL_461503	Gujarat	29903	99.9765	99.9721	99.98	B.1	100	100	UK, USA, Australia	7440	January-24, May-21	19	A2a	1	B.1	0.617	A	0.232	A1.19
611	461505	EPI_ISL_461505	Gujarat	29903	99.9832	99.9721	99.98	B.1	97	100	UK, USA, Australia	7440	January-24, May-21	19	A2a	1	B.1	0.998	A	0.234	A1
